# Supplementary material for: Association between Elevated Hemoglobin A1c Levels and the Outcomes of Patients with Small-Artery Occlusion: A Hospital-Based Study
Source: PLoS One. 2016 Aug 3;11(8):e0160223. doi: 10.1371/journal.pone.0160223 (PMC4972422; doi:10.1371/journal.pone.0160223)
Supplement: S1 Table — (XLS) [file pone.0160223.s001.xls]

## Sheet: minimal data set PLOS
Age	Sex	Hypertension	Smokers	Dyslipidemia	Alcohol drinkers	Obesity	TC	TG	HDL	LDL	HbA1c	NIHSS	3mRS
73	1	0	0	1	0	1	1.47	3.95	0.67	2.5	6	0	0
73	1	1	0	0	0	0	1.66	6.6	0.74	5.3	7.7	0	0
65	1	1	0	0	0	0	1.03	3.72	0.83	2.06	6.1	0	0
57	2	1	0	0	0	0	2.07	7.57	1.17	5.44	8.8	0	0
85	1	0	0	0	0	0	1.35	5.84	1.07	4.21	8.7	0	0
83	1	0	0	0	0	0	1.41	4.98	0.85	3.46	6.2	0	0
65	2	1	0	0	0	0	0.93	5.37	1.23	3.47	5.2	0	0
62	1	1	0	1	0	0	1.77	5.57	1.42	3.65	6.3	0	0
86	2	0	0	0	0	0	1.56	5.59	1.03	3.54	7	0	0
80	2	1	0	1	0	0	1.74	4.93	0.63	3.48	5.6	0	0
76	1	1	0	0	0	0	0.93	4.48	1.39	2.52	5	0	0
69	2	1	0	1	0	0	0.85	4.9	1.29	3.14	6.4	0	0
66	2	1	0	1	0	1	1.36	3.4	0.74	1.87	6.6	0	0
64	2	1	0	1	0	1	3.16	7.02	0.91	4.71	7.6	0	0
57	1	1	0	0	0	1	1.44	4.28	1.39	2.47	7	0	0
55	1	0	1	0	0	0	7.09	5.14	0.58	2.12	9.3	0	0
54	1	1	1	1	0	1	2.14	3.56	0.57	2.36	6.9	0	0
53	2	1	0	1	0	0	1.16	3.45	0.92	2.07	6.2	0	0
86	1	0	1	0	0	0	0.78	4.18	1.07	2.41	5.4	0	0
81	1	1	0	0	0	0	1.11	4.55	1.25	1.94	5.9	0	0
81	2	1	0	0	0	1	1.14	5.38	0.89	3.74	7.2	0	0
65	1	1	1	0	0	0	0.97	3.18	0.94	1.74	5.3	0	0
63	2	1	0	0	0	0	0.74	4.67	1.4	2.49	6	0	0
59	1	1	1	0	1	0	1.29	5.65	0.97	4.26	5.5	0	0
87	1	1	0	0	0	0	0.8	4.28	1.21	2.45	6.8	0	0
86	2	0	0	0	0	0	2.11	7.51	0.94	5.23	6.9	0	0
83	2	1	0	0	0	1	0.97	3.61	0.93	2.34	5.5	0	0
81	1	1	0	1	0	1	1.36	3.4	0.74	1.87	15.6	0	0
80	1	1	0	0	0	1	1.96	3.79	0.7	2.21	9.1	0	0
79	2	1	0	1	0	0	3.19	6.94	1.09	4.33	9.1	0	0
78	1	0	0	0	0	0	1.66	5.41	1.14	3.54	6.9	0	0
77	1	1	0	0	0	0	1.24	3.73	1.16	2.01	8.5	0	0
73	1	1	0	1	0	0	2.44	5.94	1.02	3.67	5.8	0	0
72	2	1	0	0	1	0	0.84	4.08	1.1	2.53	8.6	0	0
71	1	1	0	1	0	0	1.36	3.4	0.74	1.87	5.3	0	0
70	2	1	1	0	0	0	1.2	5.85	0.85	4.47	5.6	0	0
69	1	0	0	0	0	0	0.5	6.33	1.43	4.62	5.7	0	0
69	1	0	0	0	0	0	2.45	5.95	1.01	3.59	10	0	0
69	1	1	0	0	0	1	1.95	4.96	0.91	3.33	7.7	0	0
69	2	0	0	1	0	0	1.34	6.77	1.53	4.44	12.8	0	0
68	2	1	0	0	0	0	1.32	4.95	1.06	3.18	6.2	0	0
68	1	1	0	1	0	0	0.68	2.99	1.07	1.6	6.8	0	0
64	2	1	0	0	0	0	1.69	5.52	1.12	4.01	6.1	0	0
62	2	1	0	0	0	0	1.77	4.53	1.18	1.74	10.6	0	0
62	1	0	1	0	1	0	0.93	5.5	1.17	3.52	10.7	0	0
61	1	1	1	0	0	0	1.07	6.01	1.03	4.35	7.2	0	0
60	1	1	1	0	0	0	1.04	4.91	1.2	2.8	6.7	0	0
57	2	0	0	1	0	0	1.5	7.26	1.21	4.7	8.8	0	0
57	1	1	0	0	0	0	1.85	4.79	1.02	2.89	8.7	0	0
56	1	1	0	0	0	0	1.97	4.21	0.76	2.51	8	0	0
55	1	1	1	0	0	0	1.4	4.94	1.01	3.15	7.4	0	0
52	1	1	0	1	0	0	2.04	4.38	0.76	3.09	5.6	0	0
52	1	1	0	0	0	0	0.85	3.02	1.65	0.68	6.5	0	0
48	1	0	1	0	0	0	1.11	3.43	0.8	1.84	6.9	0	0
35	1	0	0	1	0	0	2.99	4.91	0.84	2.99	9.2	0	0
78	2	0	0	0	0	1	1.3	4.25	1.06	2.48	7.6	0	0
77	2	1	1	1	0	1	2.59	7.87	0.99	5.19	9.9	0	0
75	2	1	0	1	0	0	2.85	3.83	0.73	1.67	6.7	0	0
72	1	0	0	1	0	0	2.03	4.67	0.86	3.04	7.4	0	0
71	1	1	0	1	0	0	1.46	5.99	1.26	3.77	7	0	0
69	1	0	0	0	0	0	0.84	4.98	1.14	3.24	10.1	0	0
64	2	1	1	1	0	1	2.28	5.64	0.82	3.17	11.2	0	0
64	1	1	1	0	0	0	4.22	5.9	1.4	2.42	6.5	0	0
62	2	1	0	0	0	0	2.33	6.43	1.32	3.96	10	0	0
60	2	0	0	0	0	1	0.65	3.7	1.02	2.27	9.1	0	0
58	1	1	1	1	0	0	1.62	4.82	0.95	3.33	5.6	0	0
58	1	1	1	0	1	0	1.23	4.25	0.69	3.12	5.8	0	0
57	1	1	0	0	0	0	1.17	6.18	1.42	4.06	6.6	0	0
47	2	0	0	0	0	0	0.99	4.84	0.94	3.25	11.1	0	0
83	1	1	0	0	0	0	0.66	2.9	0.7	1.8	5.9	0	0
83	1	0	0	0	0	0	1.54	3.85	0.85	2.25	5.8	0	0
82	1	1	0	0	0	1	0.96	4.55	1.11	2.99	6.4	0	0
81	2	0	0	0	0	0	0.89	5.57	1.69	3.43	5.7	0	0
80	2	0	0	0	0	0	1.54	4.15	0.78	2.73	5.6	0	0
78	1	0	1	0	1	0	1.1	4.72	1.25	2.58	5.1	0	0
77	1	0	1	0	0	0	0.91	4.62	1.37	2.78	5.4	0	0
77	1	1	0	1	0	1	0.47	4.54	0.88	3.29	5.6	0	0
77	1	1	0	0	0	0	1.07	4.26	0.71	2.86	6.3	0	0
76	1	1	0	0	0	0	0.94	5.71	0.98	4.28	5.8	0	0
75	2	1	0	1	0	1	0.75	5.02	1.62	3	5.4	0	0
71	1	0	0	0	0	0	1.88	4.21	0.86	2.46	6.3	0	0
71	2	1	0	0	0	0	0.69	4.34	1.51	2.22	8	0	0
70	2	1	0	0	0	0	2.43	4.35	0.87	2.76	5.5	0	0
66	2	1	0	0	0	0	1.5	3.86	1.33	1.9	6.2	0	0
66	1	1	0	0	1	0	1.17	6.66	0.99	5.02	10	0	0
65	1	1	0	0	1	0	0.73	3.61	1.02	2.46	6	0	0
65	2	1	0	0	0	0	1.08	4.12	0.89	2.7	6.1	0	0
63	1	1	1	0	0	0	1.65	2.09	0.6	0.87	6.1	0	0
63	1	1	1	0	0	0	2.69	4.93	0.8	3.14	5.8	0	0
61	1	0	0	0	0	0	2.5	4.28	1.11	2.27	6.9	0	0
60	2	1	0	0	0	0	0.66	4.55	1.18	3.04	5.8	0	0
57	1	1	0	0	0	0	1.33	4.33	0.94	2.56	6.4	0	0
51	2	1	0	0	0	0	0.52	4.31	1.45	2.33	6	0	0
47	2	1	1	0	0	0	0.86	4.81	1.28	3.1	5.4	0	0
44	1	1	1	0	1	0	1.14	3.07	0.93	1.88	5.6	0	0
44	1	1	1	0	0	0	1.55	4.98	1.08	3.32	6.3	0	0
43	2	0	0	0	0	0	0.93	3.22	0.81	2.04	6	0	0
87	2	0	0	0	0	0	0.65	4.77	1.44	2.21	5.3	0	0
83	2	0	0	0	0	0	0.97	4.93	1.2	3.38	5.3	0	0
82	2	0	0	0	0	0	0.39	4.79	2.03	2.09	5.7	0	0
81	1	1	0	0	0	0	0.45	4.64	1.47	2.75	6	0	0
80	1	1	0	1	0	0	1.24	5.74	0.87	4.35	5.8	0	0
78	1	0	1	0	0	0	2.69	4.56	0.69	2.75	8.2	0	0
76	1	1	1	0	1	0	1.21	5.11	1.29	3.18	5.7	0	0
76	2	1	0	0	0	0	0.73	4.57	1.48	2.75	5.9	0	0
76	2	1	0	0	0	1	1.34	4.9	1.34	2.78	6.3	0	0
75	2	0	1	0	0	0	1.01	5.47	1.27	3.49	6.1	0	0
74	1	0	0	1	0	0	0.84	3.88	0.87	2.6	5.9	0	0
74	2	0	0	1	0	0	4.1	5.24	0.69	2.61	9.3	0	0
72	1	1	0	0	0	0	1.09	3.58	0.92	2.12	5.9	0	0
71	1	1	1	0	0	0	1.61	5.3	1.26	3.09	6.2	0	0
70	2	1	0	0	0	0	1.03	5.57	1.93	2.92	5.5	0	0
70	1	1	1	0	0	0	0.96	4.7	1.5	2.44	5.8	0	0
70	2	1	0	0	0	0	1.02	5.96	1.57	3.54	7	0	0
69	2	1	0	0	0	0	1.89	5.74	1.28	3.55	6.4	0	0
69	2	1	0	0	0	0	0.95	4.45	0.94	3.01	5.8	1	1
68	1	0	0	0	1	0	1.04	46.1	0.86	3.33	5.6	1	1
68	1	0	1	0	1	0	0.8	4.69	1.79	2.25	5.5	1	1
65	2	0	1	0	0	0	1.42	4.23	1.22	2.33	5.8	1	1
65	1	1	1	0	0	0	1.77	4.17	0.86	2.37	9.1	1	1
64	1	1	1	0	1	0	2.09	5.2	0.98	3.22	5.6	1	1
64	2	1	0	0	0	0	1.1	5.88	1.28	3.43	5.8	1	1
64	2	1	0	0	0	0	1.62	4.83	0.88	2.54	8.6	1	1
64	1	0	0	0	0	0	3.08	4.67	0.75	2.29	8.8	1	1
63	2	0	0	0	0	0	1.45	5.34	0.86	4.03	5.3	1	1
62	1	1	1	0	0	0	1.02	4.61	0.92	3.13	5.6	1	1
62	1	1	0	0	0	0	3.11	4.46	0.81	1.9	5.9	1	1
61	2	1	0	1	0	1	4.42	9.08	1.57	5.5	6	1	1
61	1	1	0	0	0	0	1.72	4.91	1.28	2.64	6	1	1
60	1	1	0	0	0	0	1.67	4.58	1.15	2.64	6.1	1	0
60	1	1	1	1	0	0	0.84	4.84	1.07	3.3	6.4	1	0
60	1	1	0	0	0	0	0.99	5.62	1.03	3.97	7.5	1	0
59	1	1	0	0	0	0	1.8	4.96	1.23	3.05	5.2	1	0
58	1	0	1	0	1	0	0.62	4.07	1.18	2.57	5.5	1	0
57	1	1	0	0	0	0	1.55	5.34	1.36	2.96	6.2	1	0
56	2	1	0	0	0	0	1.91	5.31	1.53	2.99	6	1	0
56	2	0	0	1	0	0	1.71	6.35	1.17	3.98	10	1	0
55	2	1	0	0	0	0	1.65	4.99	1.11	3.39	5.9	1	0
53	2	1	1	0	0	0	1.03	4.51	0.62	3.1	5.9	1	0
53	1	1	1	0	0	0	1.99	5.32	1.09	3.1	5.7	1	0
53	2	1	0	0	0	1	1.53	3.71	0.95	1.84	6	1	0
52	1	0	0	0	0	0	2.52	7.41	1.58	3.94	5.7	1	0
50	1	1	1	0	1	0	1.83	5.85	0.97	3.5	5.3	1	0
50	2	1	0	0	0	0	0.88	4.55	1.27	2.53	5.9	0	1
49	1	1	1	1	1	0	3.33	4.5	0.69	2.89	5.7	0	1
49	1	1	0	0	0	0	2.38	4.35	0.96	2.25	5.8	0	1
49	1	0	1	0	0	0	2.28	6.15	1.14	4.22	6.3	0	1
49	1	1	0	1	0	0	1.39	4.87	0.86	3.22	9	0	1
48	2	1	0	0	0	0	3.22	5.71	1.24	3.36	5.9	0	1
48	1	0	1	1	0	0	1.74	5.24	1.08	3.11	5.9	0	1
48	1	0	1	1	0	0	1.74	5.24	1.08	3.11	5.9	0	1
47	1	0	1	0	1	0	1.95	5.49	1.45	3.14	5.5	0	1
46	1	1	0	1	0	0	1.02	4.84	0.96	3.58	5.9	0	1
46	1	1	1	0	1	1	1.77	7.57	0.87	6.02	6.3	0	1
43	1	1	0	0	0	0	1.16	4.8	0.86	3.65	6.1	0	1
42	1	0	1	0	1	0	1.46	4.67	0.9	3.32	5.8	0	1
31	1	1	0	1	0	0	1.31	6.05	1.18	3.79	5.8	0	1
93	1	0	0	1	0	0	1.33	4.6	1.32	2.65	6.4	0	1
90	1	1	1	0	0	0	1.58	5.18	0.88	3.31	6.6	0	1
88	1	1	1	0	0	0	1.44	5.2	0.95	3.23	5.9	0	0
86	2	1	0	0	0	0	1.81	4.56	0.8	2.82	6.2	0	0
86	1	1	0	0	0	0	2.15	4.4	0.74	2.68	6	0	0
86	1	1	0	0	0	0	0.7	5.41	1.2	3.54	10.1	0	0
86	1	1	0	0	0	1	0.53	3.99	0.94	2.52	6.5	0	0
85	1	1	0	1	0	0	1.07	4.56	0.93	3.32	6.4	0	0
85	2	0	0	0	0	1	1.73	4.69	0.9	2.88	7.7	0	0
84	2	0	0	1	0	0	2.48	5.58	0.71	3.57	6.2	0	0
84	1	1	1	1	0	1	1.51	5.97	1.01	4.13	6.7	0	0
83	2	1	0	1	0	1	1.44	5.8	1.14	3.43	5.9	0	0
83	2	1	0	0	0	0	0.55	4.7	1.42	2.85	6.4	0	0
83	1	1	1	0	0	0	1.12	3.8	0.92	2.17	6	0	0
82	1	1	0	0	0	0	0.84	3.57	0.82	2.08	5.6	0	0
82	1	1	1	0	1	0	1.03	3.34	1	1.56	5.3	0	0
82	1	0	0	0	0	0	2.32	3.67	0.93	2.15	5.7	0	0
82	1	1	0	0	0	0	1.65	4.56	0.96	2.93	6	0	0
82	2	1	0	0	0	0	3.14	5.99	0.8	3.27	7.9	0	0
81	1	0	0	0	0	0	0.56	4.98	1.16	3.38	8.1	0	0
80	2	0	0	0	0	0	3.13	6.66	1.27	3.03	7	0	0
79	2	1	0	0	0	1	1.63	2.8	0.8	1.56	7.7	0	0
79	2	1	0	0	0	0	1.77	5.63	1.06	3.24	9.7	0	0
79	1	1	0	1	0	0	1.74	6.04	1.46	3.38	6.6	0	0
78	1	1	1	0	0	0	0.72	3.82	0.95	2.59	5.1	0	0
78	1	1	0	0	0	0	0.94	3.96	1.38	1.89	5	0	0
78	2	1	0	1	0	0	1.18	5.69	1.07	3.86	5.3	0	0
78	2	1	0	0	0	0	1.92	6.28	1.42	3.71	6.3	0	0
78	2	1	0	0	0	0	1.51	4.6	1.02	2.65	6.2	0	0
78	1	1	0	0	0	0	0.97	4.37	1.11	2.84	6.3	0	0
78	1	1	0	0	0	0	1.38	4.62	0.87	2.52	8.3	0	0
77	2	1	0	0	0	0	0.68	4.41	2.1	1.65	5.5	0	0
77	2	1	0	0	0	0	1.18	5.45	0.81	3.99	5.8	0	0
77	1	1	0	0	0	0	1.46	4.17	0.92	2.72	5.8	0	0
77	1	1	0	0	0	0	1.05	3.75	0.8	2.36	6.4	0	0
77	1	1	0	0	0	0	0.68	4.07	1.18	2.09	6.8	0	0
77	1	1	0	0	0	0	2.18	5.01	0.89	2.99	6.6	0	0
77	2	1	1	0	0	0	1.6	4.82	0.9	3.37	7.3	0	0
76	1	1	0	0	0	0	1.51	5.4	1.2	3.48	5.3	0	0
76	1	1	1	0	0	0	0.7	6.08	2.25	3.08	5.4	0	0
76	2	1	0	1	0	1	1.74	5.81	1.11	3.57	6.2	0	0
76	2	0	0	0	0	0	0.86	5.35	0.94	4.02	5.9	0	0
76	2	1	0	1	0	0	1.44	5.88	1.76	3.28	6.4	0	0
76	2	1	0	0	0	0	1.36	5.65	1.32	3.47	6	0	0
76	1	1	0	0	0	0	1.26	3.62	1.24	1.88	6.2	0	0
76	2	0	0	1	0	1	1.07	4.47	0.98	2.93	9.1	0	0
76	1	1	0	0	0	1	0.96	3.57	1.2	1.63	9	0	0
76	1	0	0	1	0	0	3.59	5.4	0.63	1.51	6.5	0	0
76	1	1	0	1	0	1	1.54	5.99	0.86	3.55	9.5	0	0
75	1	0	1	0	0	0	0.7	4.83	1.45	2.76	5.4	0	0
75	2	1	0	0	0	0	0.77	5.62	1.22	3.91	5.6	0	0
75	1	0	0	0	0	0	1.74	5.1	1.07	3.1	6	0	0
75	2	1	0	0	0	0	0.76	4.54	1.19	2.91	6.1	0	0
75	1	0	0	0	0	0	0.59	3.72	0.78	2.64	6	0	0
75	1	1	0	0	0	0	0.53	4.38	0.99	2.99	5.4	0	0
75	2	1	0	0	0	0	0.7	4.83	1.45	2.76	6.2	0	0
75	2	1	0	1	0	0	0.9	4.89	1.11	3.14	6.7	0	0
75	2	1	0	1	0	0	1.7	6.16	0.99	4.15	7.3	0	0
75	2	1	0	1	0	0	0.82	4.5	1.01	3.03	6.9	0	0
75	2	1	0	0	0	0	1.15	5.71	1.42	3.3	7	0	0
75	1	1	0	0	0	0	1.87	4.62	0.78	3.06	7.7	0	0
74	1	0	0	0	0	0	1.39	3.37	0.91	2.32	5.5	0	0
74	1	0	1	0	0	0	0.84	4.16	0.96	2.91	5.5	0	0
74	2	1	0	0	0	1	2.28	7.6	1.3	5.1	6.4	0	0
74	1	1	0	0	0	1	1.23	5.31	1	3.49	6.1	0	0
74	1	0	0	1	0	0	0.82	4.53	1.26	2.67	6	0	0
74	1	0	0	0	0	0	1.09	4.11	1.01	2.4	5.9	0	0
74	1	1	0	1	0	0	3.12	6.32	0.91	3.84	6.4	0	0
74	1	1	0	0	0	0	0.74	3.96	0.78	2.58	6.6	0	0
74	1	1	1	0	0	1	2.02	4.04	0.79	2.27	6.6	0	0
74	1	1	0	1	0	1	1.95	4.99	1.04	2.88	8.5	0	0
73	1	0	1	0	0	0	1.45	5.26	1.39	1.84	5.2	0	0
73	1	1	1	0	1	0	0.66	3.66	0.86	2.29	6.1	0	0
73	2	1	0	0	0	0	1.32	5.45	0.97	3.81	6.1	0	0
73	1	1	1	0	0	0	1.35	4.06	1.03	2.42	6	0	0
73	1	1	0	0	1	0	0.95	4.88	1.41	3.07	5.8	0	0
73	2	1	0	0	0	0	1.68	6.07	1.4	3.73	5.9	0	0
73	1	1	1	0	0	0	2.13	4.26	1.03	1.69	8	0	0
73	2	1	0	0	0	0	1.38	6.94	1.5	4.09	7	0	0
72	1	1	0	0	0	0	1.86	2.61	0.6	1.43	6.1	0	0
72	1	1	0	0	0	0	1.05	5.54	1.53	3.54	5.7	0	0
72	1	1	1	0	0	0	1.2	3.31	0.95	1.85	6	0	0
72	1	1	0	0	0	0	2.07	3.76	0.73	2.06	6.1	0	0
72	1	1	0	1	1	1	1.01	3.76	1	2.35	6.4	0	0
72	1	0	0	0	0	0	0.96	4.28	0.88	2.88	5.9	0	0
72	2	1	0	0	0	0	0.77	5.95	0.98	4.43	6.9	0	0
72	2	1	0	1	0	0	4.16	6.93	1.31	3.03	12.2	0	0
72	2	1	0	0	0	0	1.76	5.53	1	3.38	7.5	0	0
72	1	1	0	1	0	0	0.98	5.64	1.94	3.31	7.4	0	0
72	1	1	0	0	0	0	0.98	5.09	1.49	2.96	6.5	0	0
72	1	1	0	0	0	1	0.58	3.79	1.16	2.19	8	0	0
72	2	1	0	0	0	0	1.38	4.21	0.76	2.43	6.8	0	0
72	1	0	0	0	0	1	1.19	4.37	1.14	2.51	8.4	0	0
71	1	0	1	0	1	0	2.5	6.12	1.07	3.65	5.4	0	0
71	1	1	0	0	0	0	1.69	4.26	0.9	2.65	5.9	0	0
71	1	1	0	1	0	0	1.14	5.07	1.05	3.45	6	0	0
71	1	0	1	0	0	0	0.99	5.25	0.98	3.59	6	0	0
71	1	1	1	0	0	0	2.01	5.58	1.18	3.35	6.3	0	0
71	1	1	1	0	0	0	1.04	5	1.44	3.3	6.1	0	0
71	1	1	0	0	0	0	1.18	4.86	1.26	3.06	5.6	0	0
71	1	0	0	1	0	0	2.08	3.79	0.64	2.31	6.1	0	0
71	1	1	1	0	0	0	2.08	4.03	0.93	2.07	6.1	0	0
71	1	1	0	0	0	0	1.37	5.34	0.85	2.89	6.5	0	0
71	2	1	0	0	0	0	1.8	4.73	0.96	3.02	8.8	0	0
71	2	0	0	0	0	0	2.54	6.78	1.06	4.26	7.9	0	0
71	1	1	0	0	0	0	0.96	4.39	0.96	2.92	7.3	0	0
71	1	1	1	0	0	0	1.27	5.2	1.27	2.62	12.4	0	0
70	1	1	0	0	0	0	2.14	5.14	1.45	3.14	5.1	0	0
70	1	1	1	0	0	0	1.7	3.49	0.95	2.39	5.2	0	0
70	1	1	0	0	0	0	1.07	3.43	0.96	1.99	6	0	0
70	2	1	0	0	0	1	1.47	5.55	0.97	4.02	6.1	0	0
70	1	1	1	0	1	0	3.03	4.24	0.57	2.06	9	0	0
70	1	1	0	0	0	0	1.13	4.16	0.9	2.88	8	0	0
70	1	1	0	0	0	0	1.17	4.23	0.95	2.51	7.1	0	0
70	2	1	0	1	0	0	1.9	4.98	1.03	3.2	6.9	0	0
70	2	1	0	0	0	0	2.34	4.67	1.2	2.35	7.3	0	0
69	1	0	1	0	0	0	0.96	4.25	1.21	1.72	6	0	0
69	1	1	1	0	1	0	0.89	4.19	1.12	2.54	5.8	0	0
69	1	1	1	1	0	0	1.68	6.58	1.84	3.35	9.2	0	0
69	1	1	0	1	0	0	1.12	3.82	0.92	2.43	9.2	0	0
69	2	1	0	0	0	0	1.95	6.8	0.99	4.45	8.1	0	0
69	2	1	0	0	0	0	1.2	5.15	1.47	2.68	7.4	0	0
69	1	1	0	0	0	0	2.15	5.57	0.78	3.3	7.6	0	0
69	1	1	0	1	0	0	0.73	5.42	1.05	3.78	7.1	0	0
68	1	1	0	0	0	0	1.02	4.53	1.1	2.82	5.8	0	0
68	2	1	0	0	0	0	1.2	3.5	0.96	1.97	5.7	0	0
68	2	1	0	1	0	0	1.3	6.19	1.02	3.74	6	0	0
68	1	1	0	0	0	0	1.03	5	1.33	3	5.9	0	0
68	1	1	0	0	0	0	0.66	3.94	1.12	2.37	6.3	0	0
68	2	1	0	0	0	0	1.29	6.46	1.11	4.35	5.8	0	0
68	1	1	0	0	0	0	1.12	4.18	1.06	2.71	5.9	0	0
68	2	1	0	0	0	0	2.68	5.36	1.06	3.38	5.4	0	0
68	1	1	1	1	1	0	1.52	5.69	1.1	4.02	7.6	0	0
68	2	1	0	0	0	0	3.3	7.17	0.97	3.95	7.1	0	0
68	1	1	1	0	0	1	1.94	2.82	0.62	1.62	6.8	0	0
68	2	1	0	0	0	0	1.95	5.55	1.27	3	8.5	0	0
68	2	1	0	1	0	0	0.99	6.02	2.08	3.67	6.6	0	0
67	1	1	0	0	0	0	1.51	5.28	1.26	3.25	5.2	0	0
67	1	0	0	0	0	0	0.81	3.77	0.99	2.59	5.5	0	0
67	1	1	0	1	0	0	1.52	5.69	1.1	4.02	5.4	0	0
67	2	1	1	0	0	1	1.96	5.22	0.86	3.03	6.1	0	0
67	1	1	1	0	0	0	1.42	3.83	0.9	2.39	5.9	0	0
67	1	1	1	1	1	0	3.79	6.02	1.05	1.35	6.2	0	0
67	1	1	0	0	0	0	0.98	4.78	1.34	2.76	6.1	0	0
67	1	1	0	0	1	0	1.07	5.09	1.47	3	6.1	0	0
67	1	0	1	0	0	0	3.04	4.59	0.69	2.72	6.1	0	0
67	1	0	0	0	0	0	0.93	4.6	1.13	3.1	5.9	0	0
67	1	1	1	0	0	0	1.28	3.28	1.07	2.12	5.8	0	0
67	1	1	0	1	0	0	0.87	4.34	0.89	3.1	5.9	0	0
67	1	1	1	0	0	0	2.06	4.04	0.68	2.25	6.3	0	0
67	1	1	1	0	0	0	2.22	4.43	0.72	2.25	7.7	0	0
67	2	0	0	1	0	0	1.82	5.42	1.14	2.38	8.3	0	0
67	2	0	0	0	0	0	1.14	5.67	1.59	3	6.8	0	0
67	1	1	1	0	1	0	0.91	4.64	1.06	2.94	8.8	0	0
67	1	1	0	0	0	0	1.12	4.79	1.23	2.82	9.4	0	0
67	2	0	0	0	0	0	2.64	5.68	0.91	2.57	6.7	0	0
67	1	1	0	1	0	0	2.77	4.29	0.69	2.29	7.3	0	0
66	1	1	0	0	0	1	1.21	4.61	0.9	3.2	5.3	0	0
66	2	1	0	0	0	0	0.77	5.08	1.37	3.18	5.6	0	0
66	2	1	0	0	0	0	1.06	4.81	1.3	2.6	5.2	0	0
66	1	1	0	0	0	0	1.46	3.88	0.84	2.69	6.4	0	0
66	1	1	0	0	0	0	1.61	5.53	0.91	4.1	6	0	0
66	2	1	0	0	0	1	1.39	4.88	1.15	3.25	5.8	0	0
66	2	1	0	1	0	0	1.11	7.04	1.38	4.6	5.9	0	0
66	1	1	0	0	0	0	2.25	3.7	0.61	2.31	6.2	0	0
65	1	0	1	0	1	1	1.91	4.75	1.02	3	5.6	0	0
65	1	1	1	0	0	0	1.21	5.24	0.98	3.55	6	0	0
65	2	0	0	0	0	0	1.32	5.3	1.14	3.41	6.4	0	0
65	1	1	0	1	0	0	2.99	4.74	0.78	2.91	6.2	0	0
65	1	1	0	0	0	0	2.4	6.07	1.37	3.22	6	0	0
65	1	1	1	0	0	1	4.58	6.18	0.75	3.95	5.7	0	0
65	1	1	0	0	0	0	0.92	3.17	0.89	1.89	5.7	0	0
65	2	1	0	1	0	0	1.4	5.75	1.27	3.65	5.9	0	0
65	1	1	0	0	0	1	1.07	4.4	0.95	2.89	6.4	0	0
65	2	1	0	0	0	0	1.61	4.57	1.25	2.44	6.4	0	0
65	2	1	0	0	0	0	1.72	5.34	1.14	3.45	9.7	0	0
65	1	0	1	0	0	0	2.73	5.21	0.81	3.49	9.7	0	0
65	2	1	0	1	0	0	0.82	5.57	1.22	3.83	8.5	0	0
65	1	1	1	1	1	0	1.3	3.38	0.63	2.18	7	0	0
65	1	0	1	0	0	0	1.45	4.31	0.91	2.74	10.5	0	0
65	1	0	0	0	0	0	1.73	4.57	1.15	1.6	6.7	0	0
65	1	1	1	0	0	0	1.71	5.35	1.03	3.62	8.4	0	0
64	1	1	1	0	0	0	3.6	4.24	1.09	1.58	5.6	0	0
64	1	1	0	0	0	0	2.15	5.45	1.11	3.69	5.4	0	0
64	1	1	1	1	0	0	1.97	5.2	1.24	3.42	5.5	0	0
64	1	1	1	0	0	0	1.4	4.51	0.64	3.64	5.4	0	0
64	1	0	1	0	1	0	1.91	5.79	1.78	2.81	6.3	0	0
64	1	1	0	0	0	0	0.64	4.74	1.51	2.79	5.7	0	0
64	2	1	0	0	0	0	1.82	5.71	1.09	3.23	6.1	0	0
64	1	0	0	0	0	0	1.12	3.11	0.76	1.88	5.8	0	0
64	1	1	0	0	0	0	1.09	3.96	0.76	2.37	5.8	0	0
64	1	1	0	0	0	0	0.85	5.35	1.17	3.63	5.8	0	0
64	2	0	0	0	0	0	1.55	3.78	1.09	1.73	7	0	0
64	1	0	0	0	0	0	0.84	4.42	0.87	2.87	7.7	0	0
64	1	0	0	0	0	0	0.92	3.7	0.83	2.53	8.6	0	0
64	2	0	0	0	0	1	1.71	5.01	1.22	3.31	6.6	0	0
64	2	1	0	0	0	0	1.59	4.8	1.09	2.47	8.5	0	0
64	2	0	1	0	1	0	1.19	4.73	1.62	2.38	12.3	0	0
64	2	1	0	1	0	0	3.54	5.8	1.44	3.35	6.9	0	0
64	2	0	0	1	0	0	2.04	6.04	1.07	3.49	7	0	0
63	1	1	1	1	0	0	0.87	3.99	1.05	2.58	5.6	0	0
63	1	1	1	0	1	0	1.09	4.61	0.94	3.23	5.6	0	0
63	1	1	0	1	0	1	1.02	4.91	1.12	3.39	5.6	0	0
63	1	1	1	0	1	0	1.34	5	0.94	3.04	5.5	0	0
63	1	0	1	0	1	0	0.91	3.34	0.71	2.04	5.7	0	0
63	1	1	1	0	0	1	1.64	4	1.16	1.77	6	0	0
63	1	1	1	0	0	0	1.52	5.69	1.1	4.02	6.3	0	0
63	1	1	0	0	0	0	1.18	4.34	1.07	1.91	5.7	0	0
63	2	0	0	0	0	0	2.09	3.8	0.89	1.83	5.7	0	0
63	1	1	1	1	1	0	1.98	5.97	1.17	4.02	5.8	0	0
63	1	1	1	0	0	0	1.45	3.97	0.8	2.69	6.3	0	0
63	1	1	0	0	1	0	0.89	2.72	0.62	1.49	7.2	0	0
63	2	1	0	1	0	1	3.48	5.62	0.67	2.91	7.9	0	0
63	1	1	0	0	0	0	2.09	4.52	1.04	2.85	6.6	0	0
63	2	0	0	1	0	0	2.94	6	0.86	3.39	7	0	0
63	1	1	1	0	0	0	1.25	4.99	1.17	3.4	9	0	0
63	2	1	0	1	0	0	5.12	5.58	0.89	2.56	6.8	0	0
63	1	1	0	0	0	0	1.77	3.81	0.74	2.38	8.9	0	0
63	1	1	1	0	1	0	1.46	3.51	0.86	2.13	8.7	1	1
63	1	0	0	1	0	0	1.64	6.16	1.07	4.15	6.9	1	1
63	1	0	0	0	0	0	1.98	4.43	0.91	2.54	7.3	1	1
62	1	0	1	0	0	0	1.37	5.1	1	3	5.3	1	1
62	1	1	1	0	1	0	1.66	4.77	0.92	3.12	5.3	1	1
62	1	1	0	0	0	0	0.76	3.54	0.74	2.41	6.2	1	1
62	1	1	1	0	0	0	1.69	2.95	0.54	1.88	6	1	1
62	2	1	0	0	0	0	0.97	5.98	1.25	4.02	6.2	1	1
62	1	0	1	0	1	0	1.08	4.07	0.83	2.73	5.9	1	1
62	2	1	1	0	0	0	2.86	4.92	1.14	2.52	6.4	1	1
62	2	1	0	1	0	0	0.81	6.42	1.33	4.27	6	1	1
62	2	1	0	1	0	0	2.42	5.27	1.19	2.87	6.6	1	1
62	2	1	0	1	0	1	1.5	5.47	1.22	3.47	6.7	1	1
62	2	1	0	0	0	0	1.82	4.7	0.95	2.86	6.8	1	1
62	1	0	1	1	0	0	1.8	4.18	0.76	2.82	6.8	1	1
62	2	1	0	0	0	0	1.14	5.5	1.93	1.49	9.6	1	0
62	2	1	0	1	0	0	3.06	4.51	0.9	2.8	6.6	1	0
62	1	1	0	0	0	0	1.82	3.47	0.92	1.56	7.1	1	0
61	1	1	0	0	0	0	1.66	4.72	1.09	3	5.3	1	0
61	1	1	1	0	0	0	8.04	4.21	0.75	1.11	5.5	1	0
61	2	1	1	0	1	0	1.9	5.27	1.09	3.47	5.6	1	0
61	1	1	0	0	0	0	1.3	5.24	1.04	3.44	5.3	1	0
61	1	1	1	0	1	0	0.66	5.05	1.54	2.59	5.1	1	0
61	1	1	1	0	0	0	1.88	4.99	0.99	3.55	6	1	0
61	1	0	1	0	1	0	1.73	4.68	1.1	2.72	6.1	1	0
61	1	1	1	1	1	0	0.81	6.42	1.33	4.27	5.8	1	0
61	1	1	0	0	0	0	1.09	4.63	0.82	3.04	6	1	0
61	1	0	0	0	0	0	1.77	4.23	1.32	2.32	5.7	1	0
61	2	0	0	0	0	0	1.18	5.75	1.23	3.85	6	1	0
61	2	1	0	0	0	1	1.71	5.86	1.24	3.71	5.9	1	0
61	1	1	1	0	1	1	0.9	4.24	1.08	2.51	6.2	1	0
61	2	0	1	1	0	1	0.64	4.59	1.47	2.55	7.9	1	0
61	2	1	0	0	0	0	2.22	3.7	0.85	1.86	9.9	1	0
61	1	1	0	0	0	0	1.31	3.52	1.15	1.98	7.6	1	0
61	1	1	0	0	0	0	3.74	5.27	0.92	2.96	7.1	1	0
61	1	1	0	0	0	0	1.29	3.63	0.87	2.22	6.9	1	0
60	1	1	0	1	1	0	0.72	4.16	0.93	2.83	5.2	1	0
60	1	1	1	1	1	0	2.23	4.09	0.95	2.03	5.6	1	0
60	1	1	1	0	1	0	1.58	4.82	0.69	3.17	5.6	1	0
60	1	0	1	1	1	0	4.48	3.82	0.95	1.53	5.9	1	0
60	1	0	1	1	1	0	2.2	5.47	0.95	3.37	5.9	1	0
60	2	1	0	1	0	0	0.99	4.46	1.65	2.22	5.8	1	0
60	2	1	0	0	0	0	0.75	3.89	1.19	2.13	8.8	1	0
60	2	1	0	0	0	0	2.04	6.36	1.34	3.71	9.4	1	0
60	1	1	0	0	0	0	1.41	5.49	1.16	3.51	6.7	1	0
60	2	1	0	0	1	0	1.15	5.08	1.12	2.16	7.2	1	0
60	2	1	0	0	0	0	2.8	6.69	0.87	3.75	6.6	1	0
59	1	1	0	0	0	0	1.12	4	0.97	2.72	5.5	1	0
59	1	1	0	0	0	0	1.57	3.87	1	1.95	5.6	1	0
59	1	1	1	0	0	0	1.62	4.6	1.35	2.94	5.3	1	0
59	2	0	0	0	0	0	0.86	3.82	0.85	2.7	5.5	0	1
59	1	1	0	1	0	0	1.22	6.26	1.68	3.86	6.1	0	0
59	2	1	1	0	0	0	1.98	5.87	1.46	2.98	6.1	0	0
59	2	1	0	0	0	0	1.48	6.42	1.79	4.09	5.7	0	0
59	1	1	0	0	0	0	2.48	5.44	0.92	3.12	6.3	0	0
59	1	1	1	1	0	1	0.78	4.66	0.91	3.31	6.3	1	1
59	1	1	1	1	0	0	1.37	3.74	0.57	2.34	5.7	1	1
59	1	1	0	0	0	0	1.22	4.75	1.09	3.34	5.8	1	0
59	1	1	1	0	0	0	1.36	4.96	0.91	3.39	5.9	0	0
59	1	1	1	0	0	0	0.76	4.31	1.25	2.54	6	0	0
59	1	0	1	0	1	1	3.43	7.78	0.89	4.41	6	0	0
59	1	1	1	0	1	0	0.86	3.82	0.85	2.7	6.1	0	0
59	1	1	0	0	0	0	1.73	3.81	0.82	2.46	6.4	0	0
59	2	1	0	0	0	1	1.17	5.38	1.1	3.81	8.5	0	0
59	1	1	0	0	0	0	2.39	5.98	0.97	4.34	6.6	0	0
59	1	1	1	0	0	1	0.97	4.49	0.9	2.97	7.5	0	0
59	2	1	0	0	0	0	3.95	6.06	0.88	3.58	9.5	0	0
59	1	1	1	0	1	0	2.09	5.64	1.15	3.31	6.6	0	0
58	1	0	0	0	0	0	0.88	5.1	1.18	3.21	5.6	0	0
58	1	1	1	0	0	0	2.27	5.98	1.24	3.97	5.3	0	0
58	1	1	0	1	0	0	3.01	4.15	0.69	2.18	5.7	0	0
58	1	1	1	0	1	0	2.04	5.22	1.09	3.12	5.9	0	0
58	1	1	1	0	0	0	1.6	5.43	1.08	3.65	6	0	0
58	2	1	1	1	0	0	1.08	4.94	1.51	2.24	6.1	0	0
58	1	1	1	1	0	0	2.48	5.52	1.14	3.15	6.1	0	0
58	1	0	1	0	1	0	1	5.05	1.95	2.6	5.8	0	0
58	1	1	0	0	0	0	1.78	5.76	0.84	3.45	7.5	0	0
58	1	1	1	1	1	0	1.29	5.03	0.73	3.06	9.5	0	0
58	1	1	0	0	0	0	1.35	3.4	0.91	1.67	7.8	0	0
58	2	1	0	0	0	0	1.14	4.94	0.91	3.66	7.8	0	0
58	2	1	0	0	0	1	1.33	3.98	0.79	2.57	6.5	0	0
57	1	1	1	0	1	0	1.2	5.39	1.35	3.24	5.6	0	0
57	1	1	0	0	0	0	1.36	4.74	0.94	3.26	5.4	0	0
57	1	1	0	1	0	0	3.39	3.64	0.88	1.39	5.6	0	0
57	2	1	0	0	0	0	1.88	5.91	1.04	3.11	5.4	0	0
57	1	1	0	0	0	0	0.67	3.24	1.62	1.5	5.8	0	0
57	1	1	1	1	1	0	2.59	5.37	0.91	3.32	5.9	0	0
57	2	1	1	0	0	0	0.64	4.54	0.83	3.01	5.9	0	0
57	1	0	1	1	1	0	0.98	5.97	1.42	3.91	5.8	0	0
57	1	1	0	0	0	0	1.99	5.31	0.93	3.58	6.1	0	0
57	1	1	0	0	0	0	1.76	3.77	0.71	2.38	5.5	0	0
57	1	0	1	0	0	0	1.62	4.3	0.78	2.48	6.8	0	0
57	1	0	1	0	1	0	1.31	4.09	1.05	2.52	7.3	0	0
57	1	1	0	0	0	0	2.03	4.64	0.77	2.86	9.6	1	1
57	1	1	1	0	0	0	2.58	4.82	0.74	2.69	6.6	1	0
57	2	1	1	1	0	0	5.81	4.24	1.05	1.43	8.5	1	0
57	2	1	0	0	0	0	3.71	4.9	0.68	2.75	7.8	1	0
57	1	1	1	1	0	0	1.78	4.86	0.68	3.38	7.3	1	0
56	1	1	1	0	0	0	1.16	4.89	1.11	3.1	5.6	1	0
56	1	1	1	1	0	0	2.7	4.48	0.81	2.54	5.5	1	0
56	1	0	1	0	0	0	1.25	5.14	0.96	3.45	5.4	1	0
56	1	1	1	0	1	0	1.33	4.22	1.3	2.25	5.3	1	0
56	1	0	0	0	0	0	0.77	4.13	1.57	2.13	6.1	1	0
56	1	1	1	0	0	0	1.43	4.87	1.06	3.15	5.7	1	1
56	1	1	1	0	0	0	0.99	3.79	1.2	2.13	6	1	1
56	1	1	1	0	1	0	1.13	5.13	1.07	3.64	5.7	1	1
56	2	1	0	0	0	0	0.66	3.29	1.21	1.84	6.2	1	1
56	1	1	1	0	1	0	0.91	4.48	0.93	3.04	5.9	1	0
56	1	1	1	1	1	0	0.83	2.92	0.69	2.01	5.8	1	0
56	1	1	0	1	1	1	2.02	5.77	0.63	4.07	6.4	1	0
56	2	1	0	0	0	0	2.1	6.68	1.59	4.11	6.5	1	0
56	1	1	1	0	1	0	1.64	5.97	1.54	3.44	7.5	1	0
56	1	1	0	0	0	0	2.34	4.12	0.62	2.32	6.6	0	1
56	1	1	1	1	0	1	3.39	4.51	0.68	2.13	7.1	0	1
56	1	0	0	1	0	0	2.37	4.62	0.81	2.93	8.5	0	1
55	1	0	1	1	1	0	1.08	6.06	1.61	4.02	5.6	0	1
55	1	1	1	0	0	0	0.56	2.75	0.57	1.87	5.4	0	1
55	2	0	0	0	0	0	0.57	4.71	1.3	2.89	5.6	0	1
55	1	1	0	0	1	0	1.11	4.75	1.53	2.64	6.4	0	1
55	1	1	1	0	0	0	2.41	5.11	0.82	3.35	5.9	0	1
55	1	1	1	0	1	0	0.86	3.82	0.85	2.7	5.9	0	1
55	2	1	1	0	0	0	1.09	4.44	0.72	2.84	6	0	1
55	1	1	0	0	0	0	2.56	3.14	0.71	1.64	6.2	0	1
55	1	1	1	0	0	0	1.52	5.44	1.25	3.73	5.7	0	1
55	1	0	1	0	1	0	1.65	3.86	1.05	2.21	5.8	0	1
55	1	1	1	1	0	0	2.1	5.59	0.94	3.66	6.2	0	1
55	2	1	0	1	0	0	2.21	7.31	1.28	5.1	10.5	0	1
55	2	1	0	1	0	0	2.5	5.06	0.97	2.9	6.8	0	1
55	2	1	0	0	0	0	1.63	6.59	1.55	4.34	7.2	0	1
55	2	0	0	1	0	0	2.63	6.07	0.88	4.25	9.1	0	1
54	1	1	1	0	0	0	1.17	4.81	1.12	2.93	5.4	0	1
54	1	1	1	1	0	0	2.37	4.47	0.83	2.12	5.6	0	1
54	1	1	1	0	0	0	0.8	4.9	1.07	3.7	5.5	0	1
54	2	1	0	1	0	0	1.14	6.41	1.44	4.61	6.3	0	1
54	1	1	0	1	0	0	2.27	5.5	1.08	3.54	5.7	0	1
54	2	1	0	0	0	0	1.09	5.2	1.66	2.82	6	0	1
54	2	1	1	1	0	0	1.88	5.77	1.11	3.85	6.3	0	1
54	1	1	1	0	1	0	1.11	3.35	0.73	2.31	5.7	0	1
54	2	1	0	0	0	0	0.86	3.82	0.85	2.7	5.7	0	1
54	1	0	1	0	1	0	2.08	4.31	0.85	2.51	5.9	0	1
54	1	1	0	0	0	0	1.6	5.37	1.28	3.54	6	0	1
54	1	1	1	0	0	0	2.46	3.04	0.75	1.21	6.3	0	1
54	1	1	1	1	0	0	4.5	7.38	1.15	3.71	8.9	0	1
54	2	1	0	1	0	0	2.63	4.36	1.05	2.12	6.7	0	1
54	2	1	1	0	0	0	1.32	6.38	1.72	3.84	12	0	1
54	2	1	0	0	0	0	0.75	4.88	1.56	2.67	8.7	0	1
54	2	1	0	0	0	0	0.49	4.96	1.34	3.15	7	0	1
54	1	0	1	0	0	0	4.26	4.89	0.87	2.52	7.9	0	0
54	1	1	1	1	0	0	1.43	6.33	1.05	4.01	9	0	0
53	1	1	1	1	1	0	2.59	5.17	0.98	2.73	4.9	0	0
53	1	1	1	0	0	0	1.24	4.18	1.16	2.47	5.2	0	0
53	2	1	0	0	0	0	1.06	3.9	1.55	1.43	5.6	0	0
53	1	1	1	0	0	0	1.96	4.16	0.76	2.78	6.2	0	0
53	1	1	1	1	0	0	1.68	7.39	1.15	5.35	5.7	0	0
53	1	0	0	0	1	0	0.87	4.88	1.68	2.75	5.9	0	0
53	1	0	1	1	0	0	1.89	5.85	0.98	4.08	5.8	0	0
53	2	1	0	0	0	0	0.53	4.43	1.52	2.41	5.8	0	0
53	2	1	0	0	0	0	1.47	5.27	1.02	3.74	5.7	0	0
53	1	1	1	0	1	0	1.19	4.27	0.79	2.83	6.3	0	0
53	1	0	1	1	1	0	2.27	6.09	1.33	3.6	10	0	0
53	1	1	0	1	1	0	1.95	5.43	0.9	3.71	7.1	0	0
53	1	1	0	0	0	0	1.18	2.9	0.84	1.42	7.9	0	0
53	1	0	0	1	1	0	2.42	5.74	0.91	3.88	9.6	0	0
53	1	1	1	1	0	0	1.53	4.62	1.11	3.18	6.5	0	0
53	1	1	0	0	0	0	2.1	4.3	0.76	2.88	6.8	0	0
53	1	1	0	1	0	1	6.58	6.97	1.32	2.85	10.3	0	0
52	1	0	1	1	0	0	2.53	4.59	0.59	2.83	5.6	0	0
52	1	1	1	1	0	0	1.67	5.54	1.53	3.34	5.6	0	0
52	2	1	0	0	0	0	1.17	6.52	1.54	4.19	6.3	0	0
52	1	1	0	0	0	0	1.48	4.29	0.81	2.86	5.9	0	0
52	1	1	1	0	0	0	2.27	6.36	1.3	3.96	6.3	0	0
52	1	0	1	0	1	0	1.47	4.23	0.96	2.63	6.2	0	0
52	1	1	1	0	0	0	1.13	6.11	1.21	3.58	5.9	0	0
52	1	0	0	0	0	0	1.79	2.98	0.68	1.76	7.2	0	0
52	2	1	0	0	0	0	2.13	4.07	0.91	2.3	8.4	0	0
52	1	1	0	0	0	0	0.79	3.63	0.72	2.42	7.4	0	0
52	1	0	1	1	0	0	1.99	4.13	0.76	2.29	7.3	0	0
51	1	1	0	0	0	0	1.5	4.5	0.9	2.93	5.1	0	0
51	2	1	0	1	0	0	1.74	5.17	1.22	3.31	5.3	0	0
51	1	0	1	0	0	0	1.21	4.2	1.07	2.21	5.6	0	0
51	1	1	0	1	0	0	1.88	3.53	0.95	2	5.3	0	0
51	1	1	0	0	0	0	1.66	4.93	1.04	3.4	5	0	0
51	2	1	0	0	0	0	1.12	3.83	0.98	2.21	6.2	0	0
51	1	1	1	0	0	0	6.5	4.95	1.13	0.72	5.9	0	0
51	1	0	1	0	0	1	1.58	5	1.09	2.99	6.1	0	0
51	1	1	1	0	0	0	1.87	3.33	0.63	1.94	5.7	0	0
51	2	0	0	0	0	0	1.6	4.42	0.92	2.71	8.8	0	0
51	1	1	0	1	0	0	0.72	5.12	0.98	3.7	8.8	0	0
51	2	1	0	1	0	0	3.17	4.93	0.7	2.06	6.7	0	0
51	1	1	0	0	1	0	0.99	4.88	1.13	3.49	9.5	0	0
51	2	1	0	1	0	0	3.12	6.32	1.04	3.89	7.9	0	0
50	2	0	1	0	0	1	1.26	5.23	0.74	3.75	5.6	0	0
50	2	1	0	0	0	0	4.16	5.71	0.8	3	5	0	0
50	2	1	0	0	0	1	1	4.23	0.97	2.27	6	0	0
50	1	0	1	0	0	0	1.05	5.17	1.11	3.19	5.9	0	0
50	1	0	1	0	1	0	0.98	4.81	1.04	3.11	6	0	0
50	1	1	1	1	0	0	1.97	6	1.2	3.83	5.9	0	0
50	1	1	1	0	0	0	1.7	4.23	0.99	2.78	5.8	0	0
50	1	0	1	0	0	0	1.88	4.24	1.18	2.09	5.7	0	0
50	1	0	1	0	0	0	1.11	3.75	1	2.12	6.2	0	0
50	1	1	1	1	1	0	2.32	4.16	1.04	2.49	7.6	0	0
50	1	1	1	0	0	0	2.64	6.32	1.18	3.96	9	0	0
50	1	1	0	0	0	0	0.99	4.73	1.27	3.01	6.5	0	0
50	1	1	1	0	1	0	1.43	5.41	1.12	3.44	9.4	0	0
49	1	1	1	1	1	0	1.81	6.14	1.22	4	5.8	0	0
49	1	1	1	0	1	0	0.85	4.48	1.18	3.06	6.2	0	0
49	2	1	0	0	0	1	1.11	3.75	0.97	2.38	6	0	0
49	1	1	1	0	0	0	1.21	4.53	1.05	2.82	5.8	0	0
49	1	1	0	0	0	0	4.05	5.38	1.07	2.23	6.2	0	0
49	1	0	1	0	0	0	2.34	4.04	1.38	1.89	6.1	0	0
49	1	0	1	1	1	0	1.2	5.01	1.13	3.19	5.7	0	0
49	1	1	1	0	1	0	1.36	3.97	0.81	2.45	6.1	0	0
49	1	1	1	0	1	0	2.28	4.93	0.58	3.2	9.7	0	0
48	1	1	1	0	1	0	1.47	4.41	0.8	2.97	5.5	0	0
48	1	0	1	0	0	0	1.27	4.34	0.91	2.73	4.9	0	0
48	1	0	1	0	0	0	1.3	3.74	0.79	2.57	5.9	0	0
48	2	1	1	0	0	0	1.9	2.78	0.73	1.45	6.2	0	0
48	1	1	1	1	1	0	1.74	4.81	1.26	2.99	6.2	0	0
48	1	1	1	0	1	0	1.83	5.88	1.8	3.18	6.2	0	0
48	1	1	1	1	1	0	5.12	4.96	0.98	2.13	6.3	0	0
48	2	1	0	1	0	0	9.13	4.85	0.82	1.43	5.8	0	0
48	1	1	0	0	0	0	1.34	4.32	0.91	3.15	6.2	0	0
48	1	1	1	0	1	0	1.76	5.54	1.1	3.32	6.7	0	0
48	1	1	0	0	0	0	1.63	5.03	1.01	3.48	7.8	0	0
48	1	0	1	0	0	0	0.67	4.98	0.96	3.39	9.4	0	0
47	1	1	1	0	1	0	0.59	5.46	1.86	2.83	5.6	0	0
47	1	1	1	1	1	0	4.1	5.34	0.77	2.31	5.2	0	0
47	1	1	1	1	1	0	2.9	4.4	0.9	2.2	5.6	0	0
47	2	1	0	0	0	0	0.99	4.33	1.2	2.67	5.6	0	0
47	1	1	1	0	0	0	2.01	5.48	0.98	2.84	5.4	0	0
47	1	1	1	0	0	0	1.48	4.16	1.01	2.87	4.6	0	0
47	2	0	0	0	0	0	1.07	4.02	1.06	2.43	5.4	0	0
47	1	1	1	0	0	1	0.83	4.43	1.28	2.72	6.1	0	0
47	1	1	1	0	0	0	1.7	5.13	0.9	3.5	6.3	0	0
47	1	0	1	0	0	0	0.8	3.89	1.2	2.26	9.1	0	0
46	1	1	1	1	1	0	2.07	4.7	0.92	2.92	5.4	0	0
46	1	1	0	1	0	0	1.97	4.55	0.81	2.9	6.2	0	0
46	1	1	0	0	0	0	1.01	5.32	1.51	3.56	5.7	0	0
46	1	1	1	0	1	0	1.9	5.07	0.9	3.32	6.1	0	0
46	2	1	0	0	0	0	6.3	5.57	0.8	3.3	9	0	0
46	1	1	1	1	1	0	3.26	5.16	0.85	2.77	7.4	0	0
46	1	1	0	0	0	0	4.28	4.94	0.77	2.64	6.8	0	0
45	1	1	0	0	0	0	2.04	5.15	0.73	3.4	5.6	0	0
45	2	1	0	1	0	0	1.19	4	0.82	2.61	5.6	0	0
45	1	1	1	0	1	0	1.38	5.07	1.54	2.8	5.4	0	0
45	1	1	0	0	0	0	0.76	4.44	0.74	3.29	5.7	0	0
45	2	1	0	0	0	0	0.55	2.84	0.74	1.72	5.8	0	0
45	1	1	1	0	0	0	1.37	3.68	0.88	2.07	9.7	0	0
45	1	1	0	1	0	0	2.62	5.38	1.02	3.62	6.5	0	0
45	1	1	1	0	1	0	1.53	5.15	1.08	3.11	10.6	0	0
44	1	1	1	0	1	0	1.52	4.97	1.49	2.67	4.9	0	0
44	1	1	1	1	1	1	2.44	4.27	1.1	2.55	5.8	0	0
44	1	1	1	0	0	0	4.97	6.2	0.86	3.06	6.2	0	0
43	1	0	1	1	1	0	3.26	4.94	0.75	3.04	5.6	0	0
43	1	0	0	0	1	1	2.16	5.49	0.91	3.8	5.8	0	0
43	2	1	0	0	0	0	1.2	4.94	1.1	3.07	6.3	0	0
43	2	1	0	1	0	1	2.01	5.74	1	3.83	7.4	0	0
43	1	1	0	0	0	1	4.83	5.59	1.01	2.71	7.4	0	0
41	1	0	1	1	1	0	1.35	4.04	0.77	2.53	5.4	0	0
41	1	0	1	0	1	0	1.42	5.6	1.13	3.83	5.1	0	0
41	2	0	1	1	0	0	1.09	4.89	0.84	3.52	5.2	0	0
41	1	0	0	0	0	0	2.3	5.74	0.77	3.76	5.6	0	0
41	1	1	1	1	1	0	2.04	6.33	1.71	3.54	5.7	0	0
41	1	0	1	0	1	0	1.26	3.86	1.29	2.19	5.8	0	0
41	1	0	1	0	0	0	3.79	6.03	1.13	3.21	6.1	0	0
41	1	1	1	1	0	0	1.93	5.11	0.87	3.47	8.1	0	0
40	1	1	0	0	0	0	3.76	5.92	1.43	2.72	6.5	0	0
39	1	1	0	0	0	0	0.97	5.68	1.16	3.41	6.6	0	0
38	2	1	0	0	0	0	2.37	4.54	1.26	2.28	5.6	0	0
38	2	1	0	0	0	1	3.22	6.4	1.06	4.35	9.1	0	0
36	1	0	1	1	1	0	1.86	4.52	0.99	2.82	5	0	0
36	1	1	1	0	0	0	2.37	5.75	0.96	3.71	8.2	0	0
35	1	1	1	1	0	1	1.55	4.72	1.17	2.74	6.2	0	0
34	1	0	1	0	1	0	2.12	5.65	0.9	3.71	5.5	0	0
34	1	1	0	1	0	0	2.32	5.56	0.79	3.86	5.8	0	0
32	1	0	0	0	0	0	1.67	4.07	0.78	2.57	5.8	0	0
30	1	0	1	1	0	1	2.43	5.76	0.8	3.84	5.2	0	0
81	2	0	0	0	0	0	0.85	4.24	1.26	2.32	5.5	0	0
78	2	1	0	0	0	1	1.58	4.73	0.86	3.3	6.1	0	0
78	2	1	0	0	0	0	0.74	3.57	1.26	1.74	6.1	0	0
77	1	0	0	0	0	0	0.53	3.85	1.34	2.18	5.8	0	0
76	2	1	0	0	0	0	1.95	4.42	0.78	2.7	6.1	0	0
75	1	1	0	0	0	0	1.47	4.25	0.82	2.43	5.8	0	0
75	2	0	0	0	0	0	1.4	5.1	1.13	3.47	5.8	0	0
75	1	1	0	0	0	0	0.8	2.86	1.18	0.93	6.2	0	0
74	1	1	0	0	0	0	0.86	3.82	0.85	2.7	5.8	0	0
71	2	0	0	0	0	0	1.28	4.32	0.97	2.85	5.8	0	0
71	2	1	0	0	0	0	2.42	5.97	0.87	3.74	5.7	0	0
70	2	1	0	0	0	0	1.6	3.62	1.08	2	6.3	0	0
70	2	1	0	0	0	0	0.75	6.02	1.77	3.71	6.1	0	0
69	1	1	0	0	1	0	0.85	4.24	1.26	2.32	6.1	0	0
69	1	1	0	0	0	0	3.04	4.42	0.98	2.29	6	0	0
69	1	1	1	0	0	0	0.63	4.2	1.18	2.57	6.3	0	0
68	1	1	0	1	0	0	1.47	5.18	0.97	3.07	5.9	0	0
66	1	1	0	0	0	0	0.61	4.44	1.28	2.83	6.3	0	0
65	1	1	1	0	1	0	1.34	4.5	0.9	3.02	6.1	0	0
64	1	1	1	1	0	0	2	5.88	0.85	3.87	6.2	0	0
63	1	1	0	0	0	0	1.3	8.05	0.86	6.18	5.6	0	0
63	2	0	0	1	0	0	1	4.36	1.23	2.53	6.2	0	0
62	1	1	0	1	0	0	2.04	5.26	0.99	2.89	5.8	0	0
61	1	1	1	0	1	0	1.78	5.04	1.12	3.02	5.8	0	0
60	1	0	1	1	0	0	1.43	7.06	0.83	5.61	5.8	0	0
58	1	1	0	0	0	0	0.85	4.24	1.26	2.32	6	0	0
58	1	1	1	1	1	0	1.67	3.63	1.15	1.88	5.8	0	0
57	1	1	1	0	0	0	2.73	6.47	1.35	4.03	6.2	0	0
57	1	1	0	0	0	0	1.65	5.24	1.13	3.01	5.8	0	0
54	2	0	0	1	0	0	2.65	4.83	0.97	2.87	5.9	0	0
54	1	1	1	1	1	0	1.77	3.34	0.79	1.7	6.1	0	0
53	2	1	0	0	0	0	1.71	5.29	1.29	3.22	5.9	0	0
50	1	0	0	0	0	0	2.03	5.72	1.38	3.37	4.9	0	0
50	1	1	1	0	1	0	0.8	4.09	1.32	2.31	5.9	0	0
50	1	1	1	0	1	0	0.82	3.2	1.13	1.61	6.2	0	0
49	1	1	1	0	1	0	1.57	5.06	0.94	3.56	5.5	0	0
49	1	1	1	0	1	0	1.55	3.87	0.96	2.17	6	0	0
48	1	1	1	0	0	0	2.23	5.28	0.73	3.49	5.4	0	0
61	1	1	1	0	1	0	1.29	5.12	1.13	3.2	5.3	0	0
50	1	1	1	1	1	0	3.06	4.65	0.84	2.24	5.2	0	0
87	1	1	0	1	0	0	2.41	6.02	1.06	3.05	6.9	0	0
83	1	1	0	0	0	0	0.71	3.4	1.04	2.02	5.3	0	0
81	2	1	0	0	0	0	0.93	2.85	0.93	1.5	7.8	0	0
79	2	1	0	0	0	0	2.84	6	0.72	3.63	8.1	0	0
75	1	1	0	1	0	1	1.66	5.68	1.37	3.32	8	0	0
74	2	1	0	0	0	1	0.58	4.92	1.08	2.85	7.1	0	0
73	1	1	1	0	0	0	1.82	5.9	1.12	3.71	6.4	0	0
73	2	0	0	0	0	1	1.57	4.26	0.74	2.82	7.2	0	0
72	1	1	0	0	0	0	1.35	3.2	1.15	1.35	6.9	0	0
70	1	1	1	1	0	0	2.4	5.27	0.99	3.4	6.7	0	0
69	2	1	0	0	0	0	1.41	5.58	0.95	3.71	6.4	0	0
69	2	1	0	1	0	0	1.03	3.82	1.06	1.97	6.5	0	0
69	1	1	1	0	1	0	1.87	3.82	0.73	2.38	8.5	0	0
69	1	1	1	0	1	0	1.99	5.49	0.8	3.43	8.5	0	0
69	1	1	1	0	1	0	1.17	3.79	1.32	1.83	9.7	0	0
68	1	1	1	1	0	0	0.81	4.77	0.7	3.44	6.2	0	0
68	2	1	0	1	0	0	1.29	5.94	1.2	4.39	6.5	0	0
68	1	1	0	0	0	0	0.86	3.79	0.88	2.67	8.2	0	0
67	1	1	1	0	0	0	2.84	6	0.72	3.63	6.6	0	0
67	1	1	1	1	1	1	1.4	4.53	0.94	2.94	6.9	0	0
67	1	0	0	0	0	0	0.96	5.57	1.72	2.77	8.2	0	0
67	1	1	0	0	0	0	0.89	3.37	1.02	1.93	8	0	0
67	1	1	0	1	0	0	2.6	4.54	0.93	3.01	8.1	0	0
66	1	1	0	1	0	0	2.51	6.12	1.06	3.96	6.2	0	0
66	1	1	1	0	0	0	1.43	5.38	0.89	3.67	7	0	0
65	2	1	0	1	0	0	2.05	7.31	1.3	4.53	10.5	0	0
65	1	1	1	0	1	0	0.96	4.09	0.84	2.73	6.5	0	0
64	1	1	1	1	0	0	2.14	6.54	1.52	3.85	5.4	0	0
64	1	1	0	0	0	0	1.03	5.07	1.08	3.38	6.5	0	0
64	1	1	1	0	1	0	1.11	3.48	0.66	2.24	7.1	0	0
63	1	0	1	0	0	0	1.38	4.69	1.13	2.74	6.7	0	0
63	1	1	1	0	0	0	1.03	4.18	1.28	2.5	7.1	0	0
63	1	1	0	0	0	0	1.36	3.13	0.5	1.84	8.4	0	0
62	1	1	0	1	0	1	5.03	5.95	0.66	2.7	5.5	0	0
62	1	0	0	0	0	0	2.11	3.99	0.75	2.12	7.7	0	0
61	1	0	1	1	1	0	1.73	5.73	1.36	3.33	5.4	0	0
61	1	1	1	1	0	0	2.68	6.17	0.94	3.09	6.8	0	0
61	1	1	1	1	1	1	1.73	5.44	1.06	3.31	7.5	0	0
61	2	1	0	1	0	1	1.8	5.51	1.59	3.39	8.1	0	0
61	1	0	0	0	0	0	1.18	5.15	1.01	3.82	8.4	0	0
60	1	0	1	0	0	0	2.69	5.93	1.03	3.66	5.6	0	0
60	1	1	0	0	0	0	1.36	5.57	1.11	3.06	6.8	0	0
60	2	1	0	0	0	1	1.41	5.39	1.65	3.1	6.8	0	0
60	1	1	1	0	0	0	2.15	7.15	0.94	4.85	14.8	0	0
60	1	1	1	0	0	0	2.42	5.48	0.98	3.23	8.3	1	1
60	2	0	0	0	0	0	1.03	4.61	1.23	2.59	9	1	1
59	1	0	1	0	1	0	1.65	4.5	1.34	2.53	5.5	1	1
59	2	0	0	0	0	0	1.2	5.2	1.63	2.71	6.2	1	1
59	1	1	0	0	0	0	1.1	4.32	1.09	2.39	6.4	1	1
59	1	1	0	0	0	0	1.38	4.6	0.76	3.23	8.9	1	1
59	1	1	1	0	1	1	1.25	4.78	0.82	3.12	7.1	1	1
58	1	1	1	1	1	0	0.83	5.09	1.21	3.52	7	1	1
58	1	1	0	1	0	0	1.33	5.19	1.09	3.55	6.8	1	1
58	1	0	0	0	0	0	1.41	3.14	1.04	1.34	9.3	1	1
57	1	0	0	0	0	0	1.28	5.07	0.93	3.5	7.1	1	1
57	2	1	0	1	0	0	4.69	5.52	1.21	2.84	6.9	1	1
57	1	1	1	1	0	0	2.42	4.78	0.74	2.97	6.8	1	1
57	1	1	1	0	1	0	5.63	6.25	0.88	3.51	6.9	1	0
56	1	0	1	1	0	0	1.94	4.05	0.9	2.29	5.4	1	0
56	2	1	0	0	0	0	1.41	5.48	1.12	3.75	6.7	1	0
56	2	1	0	1	0	1	7.87	7.48	0.61	1.76	8.9	1	0
55	1	0	1	1	0	0	1.6	6.59	1.2	4.83	5.6	1	0
55	1	0	0	1	0	1	5.55	5.89	0.83	2.95	6.2	1	0
55	1	1	1	0	1	0	1.72	6.24	1.14	4.76	11.5	1	0
55	1	0	0	0	0	0	1.64	4.65	1.1	2.49	8.6	1	0
54	1	1	0	0	1	0	0.85	2.64	0.63	1.47	6.5	1	0
54	2	0	0	0	0	0	2.17	5.27	1.34	2.53	7	1	0
54	1	1	1	1	1	1	3.64	5.29	0.96	2.48	9.3	1	0
54	1	0	1	0	0	0	1.26	5.82	1.09	4.12	8	1	0
54	1	0	1	1	0	0	2.31	5.22	0.76	3.63	7.5	1	0
53	2	1	0	0	0	0	1.61	8.79	1.12	5.3	5.9	1	0
53	1	1	1	0	0	0	1.33	3.17	0.6	2.08	5.9	1	0
53	1	0	1	0	1	0	1.48	4.6	0.86	3.11	8.4	1	0
53	1	1	1	1	0	0	1.65	6.59	0.79	4.05	8.3	1	0
52	2	1	0	1	0	0	1.78	5.7	1.03	3.82	6.7	1	0
52	2	1	1	1	0	0	2.48	5.41	0.95	3.42	8.7	1	0
51	1	0	1	0	1	0	1.49	4.25	1.27	2.17	5.7	1	0
51	1	1	1	1	0	0	2.97	4.49	0.8	2.46	6.4	1	0
51	1	0	1	0	0	0	8.03	7.46	0.89	2.67	10.2	1	0
51	2	1	0	0	0	0	1.76	4.88	0.99	2.99	7.3	1	0
50	1	0	0	0	0	0	1.86	5.45	0.88	3.21	6.5	1	0
50	1	1	1	0	0	0	3.74	5.75	0.91	4.12	7.1	1	0
50	1	0	1	1	1	0	2.81	6.1	0.78	3.39	7.4	1	0
49	2	1	0	0	0	0	0.97	4.12	1.07	2.38	6.5	1	0
49	1	0	0	0	1	0	2.89	6.68	1.31	4.1	7.5	1	0
49	1	1	1	0	1	0	1.61	8.79	1.12	5.3	9.4	1	0
48	1	0	1	1	1	0	5.93	6.21	0.77	3.34	5.1	1	0
48	1	1	1	1	0	0	1.13	4.97	1.15	3.52	6.9	1	0
47	1	0	0	0	0	0	1.2	6.49	1.09	4.46	5.6	1	0
47	1	0	1	0	1	0	3.41	4.05	0.97	1.89	5.7	1	0
47	1	1	0	0	0	0	1.11	4.31	1.08	2.41	6.9	1	0
45	2	1	0	0	0	1	1.09	4.75	0.94	3.32	6.3	1	0
44	1	1	0	1	1	0	3.1	4.72	1.17	2.43	5.6	1	0
42	1	1	1	1	1	0	1.84	5.08	0.77	3.23	6.2	1	0
42	2	0	0	0	0	0	1.63	3.39	1.14	2.01	6.4	1	0
42	1	1	1	1	1	0	3.46	6.03	1.12	3.4	7.3	1	0
41	1	1	0	1	0	0	2.69	4.41	0.98	2.58	6.1	1	0
37	1	1	1	0	0	1	1.61	8.79	1.12	5.3	8.5	1	0
33	1	0	0	0	0	1	2.84	6	0.72	3.63	5.9	1	0
69	2	1	0	0	0	0	0.57	5.61	1.61	3.25	5	1	0
64	1	1	1	0	0	0	0.79	3.98	1.01	2.55	5.5	1	0
